# Supplementary material for: Designing Patient-Centered Text Messaging Interventions for Increasing Physical Activity Among Participants With Type 2 Diabetes: Qualitative Results From the Text to Move Intervention
Source: PubMed Central journal article supplement (PMC5422654; doi:10.2196/mhealth.6666), 2017-04-24
Supplement: mhealth_v5i4e54_app3.pdf [file mhealth_v5i4e54_app3.pdf]

| Characteristics of participants versus nonparticipants in post-intervention interviews |                                                          |                                                                 |                |
|----------------------------------------------------------------------------------------|----------------------------------------------------------|-----------------------------------------------------------------|----------------|
| Characteristics                                                                        | Participated in focus group or interview<br>% (n) (n=31) | Did not participate in focus group or interview<br>% (n) (n=15) | <i>P</i> value |
| <b>Sex</b>                                                                             |                                                          |                                                                 | .93            |
| Female                                                                                 | 39% (12)                                                 | 40% (6)                                                         |                |
| Male                                                                                   | 61% (19)                                                 | 60% (9)                                                         |                |
| <b>Ethnicity</b>                                                                       |                                                          |                                                                 | .20            |
| White                                                                                  | 74% (23)                                                 | 53% (8)                                                         |                |
| Hispanic                                                                               | 19% (6)                                                  | 20% (3)                                                         |                |
| Black                                                                                  | 3% (1)                                                   | 13% (2)                                                         |                |
| Asian or Pacific Islander                                                              | 3% (1)                                                   | 13% (2)                                                         |                |
| <b>Language</b>                                                                        |                                                          |                                                                 | .66            |
| English                                                                                | 87% (27)                                                 | 80% (12)                                                        |                |
| Spanish                                                                                | 13% (4)                                                  | 20% (3)                                                         |                |
| <b>Employment</b>                                                                      |                                                          |                                                                 | .40            |
| Unemployed                                                                             | 16% (5)                                                  | 7% (1)                                                          |                |
| Employed full-time                                                                     | 52% (16)                                                 | 53% (8)                                                         |                |
| Employed part-time                                                                     | 13% (4)                                                  | 20% (3)                                                         |                |
| Student                                                                                | 0% (0)                                                   | 7% (1)                                                          |                |
| Homemaker                                                                              | 7% (2)                                                   | 0% (0)                                                          |                |
| Disabled                                                                               | 10% (3)                                                  | 0% (0)                                                          |                |
| Retired                                                                                | 3% (1)                                                   | 7% (1)                                                          |                |
| Other                                                                                  | 0% (0)                                                   | 7% (1)                                                          |                |
| <b>Education</b>                                                                       |                                                          |                                                                 | .55            |
| 1st to 8th grade                                                                       | 3% (1)                                                   | 7% (1)                                                          |                |
| 9th to 11th grade                                                                      | 7% (2)                                                   | 7% (1)                                                          |                |
| 12th grade or GED <sup>a</sup>                                                         | 52% (16)                                                 | 33% (5)                                                         |                |
| 1-3 years of college                                                                   | 26% (8)                                                  | 47% (7)                                                         |                |
| ≥4 years of college                                                                    | 13% (4)                                                  | 7% (1)                                                          |                |
| <b>Marital status</b>                                                                  |                                                          |                                                                 | .19            |
| Married                                                                                | 61% (19)                                                 | 47% (7)                                                         |                |
| Living with partner                                                                    | 13% (4)                                                  | 7% (1)                                                          |                |
| Divorced or separated                                                                  | 23% (7)                                                  | 20% (3)                                                         |                |
| Single (never married)                                                                 | 3% (1)                                                   | 13% (2)                                                         |                |
| Widowed                                                                                | 0% (0)                                                   | 13% (2)                                                         |                |

<sup>a</sup>General Education Development (GED) is a high school equivalency diploma.
